# Supplementary material for: Design, Synthesis and Biological Evaluation of 6,7-Disubstituted-4-phenoxyquinoline Derivatives Bearing Pyridazinone Moiety as c-Met Inhibitors
Source: MDPI journal article supplement (doi:10.3390/molecules23071543), 2018-06-26
Supplement: s1 [file s1]

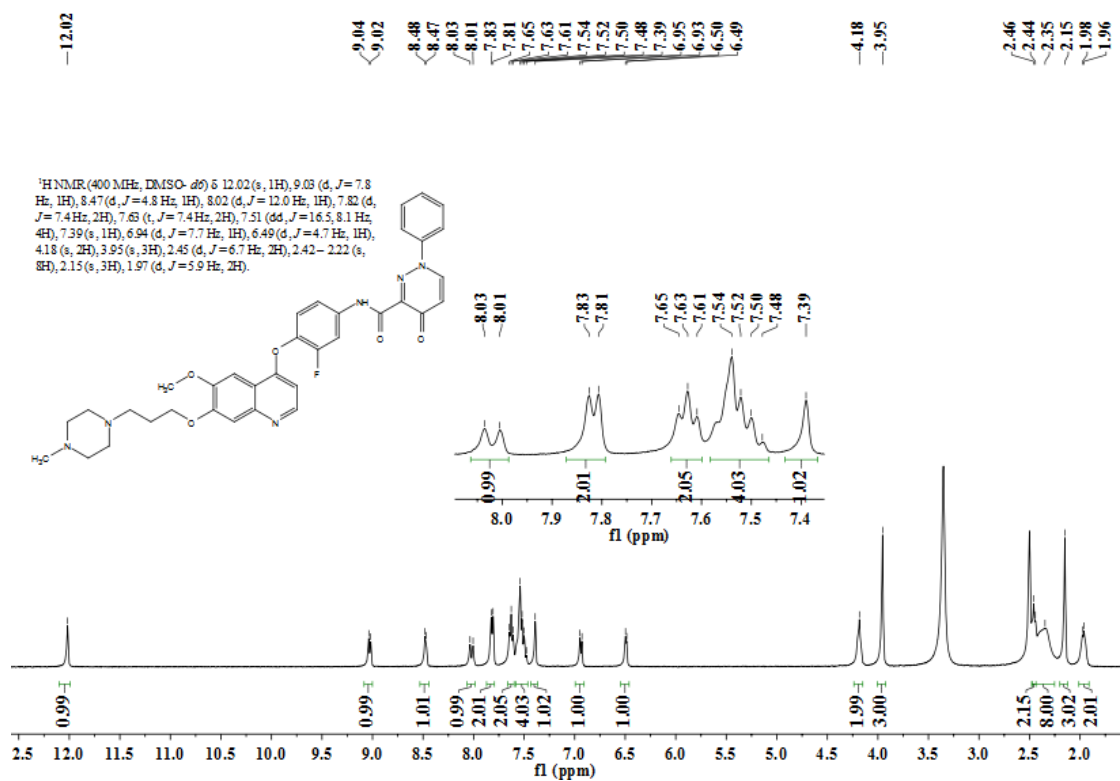

Fig.1 <sup>1</sup>H NMR spectrum of compound 53

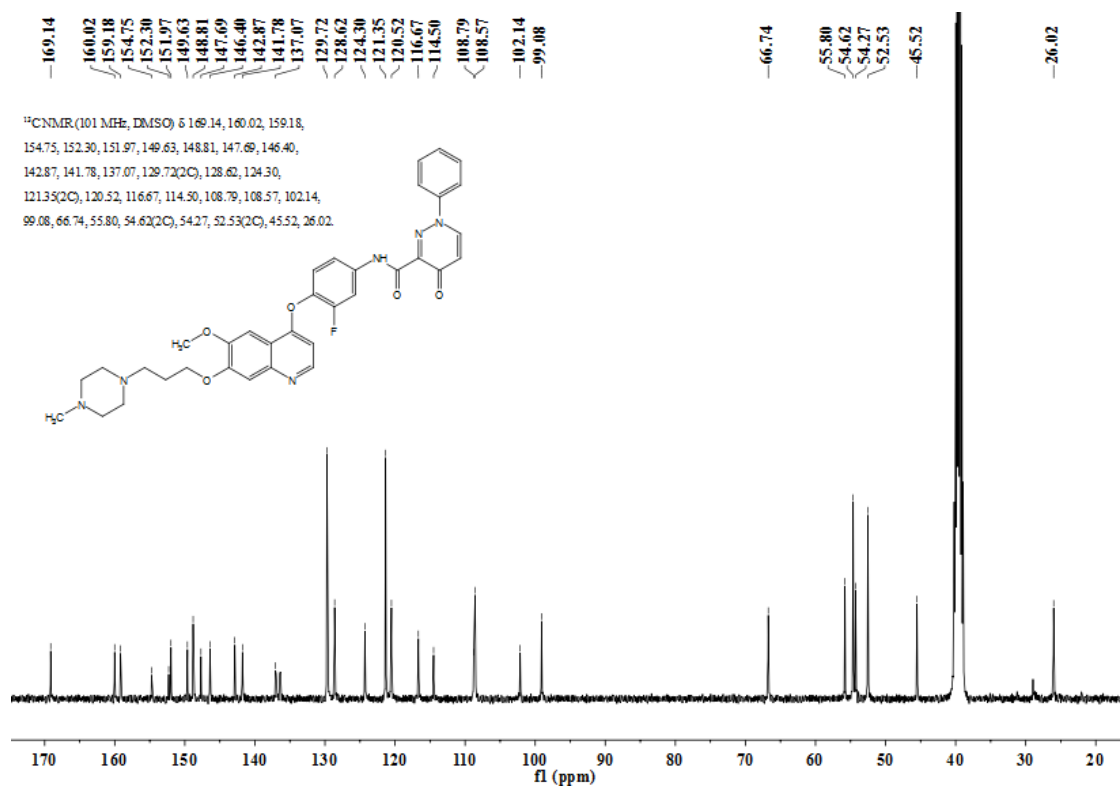

Fig.2 <sup>13</sup>C NMR spectrum of compound 53

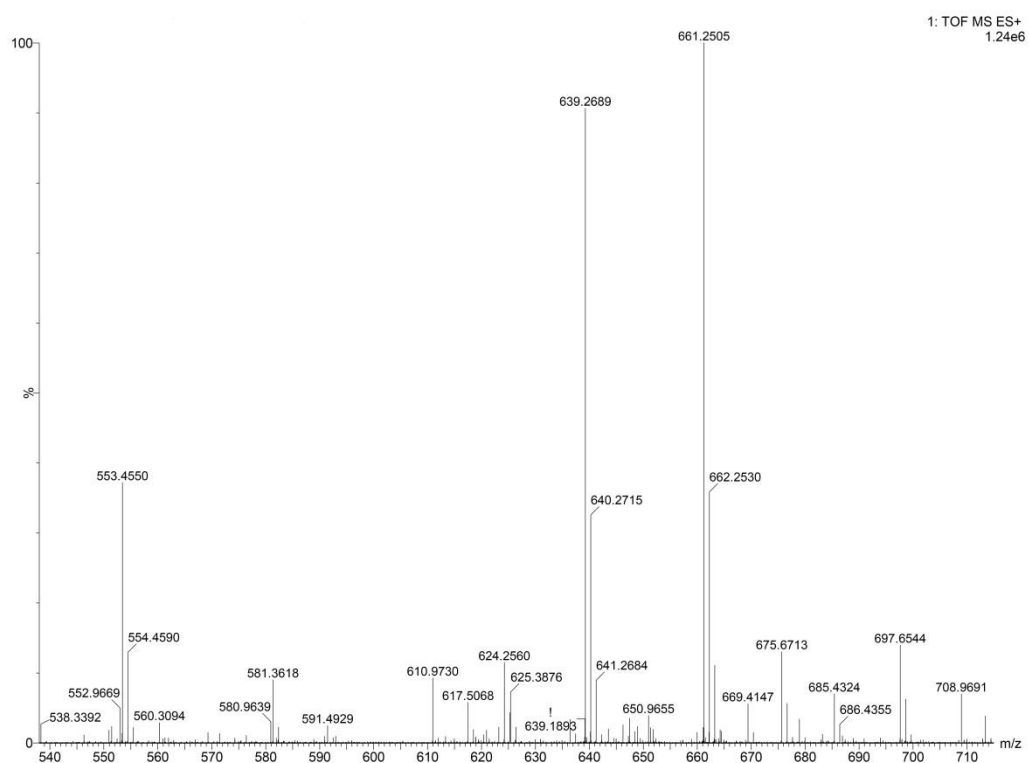

**Fig.3** LC-MS spectrum of compound **53**
